# Supplementary material for: AgInxGa1−xS2solid solution nanocrystals: synthesis, band gap tuning and photocatalytic activity
Source: Royal Society of Chemistry journal article supplement (doi:10.1039/c4ce01239a), 2014-08-22
Supplement: c4ce01239a1.pdf [file c4ce01239a1.pdf]

Supporting Information For:

## **AgIn<sub>x</sub>Ga<sub>1-x</sub>S<sub>2</sub> solid solution nanocrystals: synthesis, band gap tuning and photocatalytic activity**

Na Liang<sup>a</sup>, Qingquan He<sup>a</sup>, Shoushuang Huang<sup>a</sup>, Min Wang<sup>a</sup>, Wenlong Chen<sup>a</sup>, Miao Xu<sup>a</sup>, Yanping Yuan<sup>a</sup>, Jiantao Zai<sup>\*a</sup>, Nenghu Fang<sup>a</sup> and Xuefeng Qian<sup>\*a</sup>

School of Chemistry and Chemical Engineering

State Key Laboratory of Metal Matrix Composites

Shanghai Jiao Tong University, Shanghai, 200240 (P. R. China)

E-mail: xfqian@sjtu.edu.cn; zaijiantao@sjtu.edu.cn

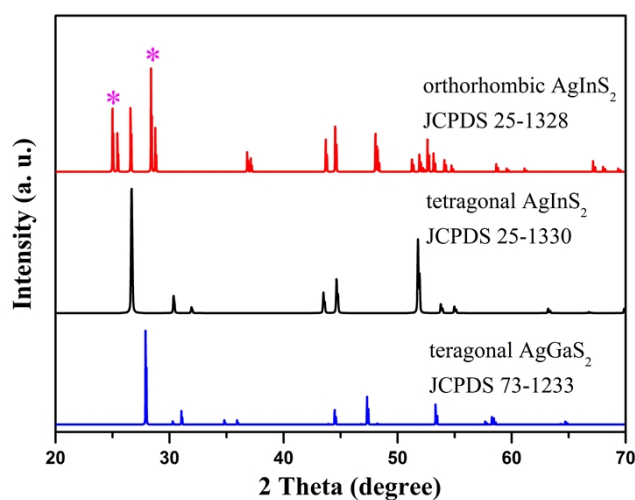

Fig. S1 XRD patterns of orthorhombic AgInS<sub>2</sub>, tetragonal AgInS<sub>2</sub> and AgGaS<sub>2</sub>.

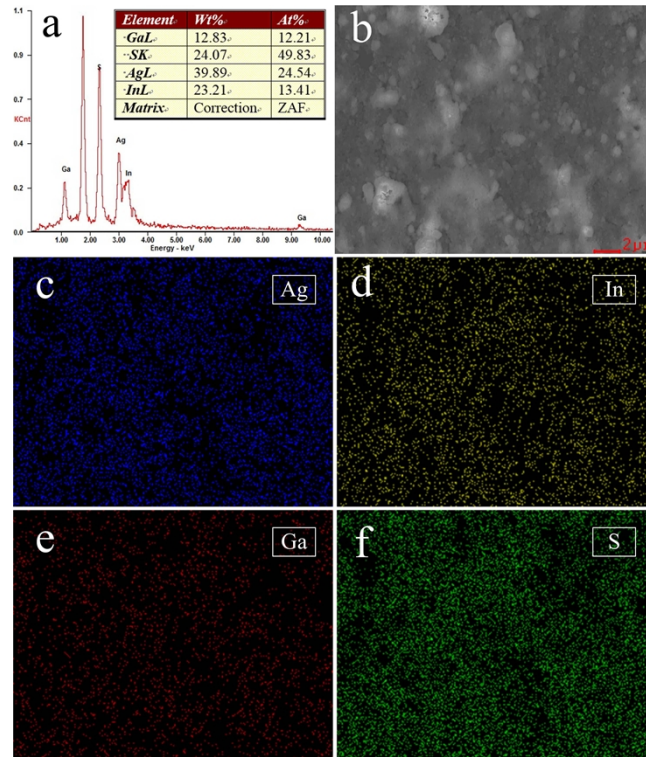

**Fig. S2** EDX spectra and elemental distribution maps for Ag, In, Ga and S of the as-prepared  $\text{AgIn}_{0.5}\text{Ga}_{0.5}\text{S}_2$  solid solutions.

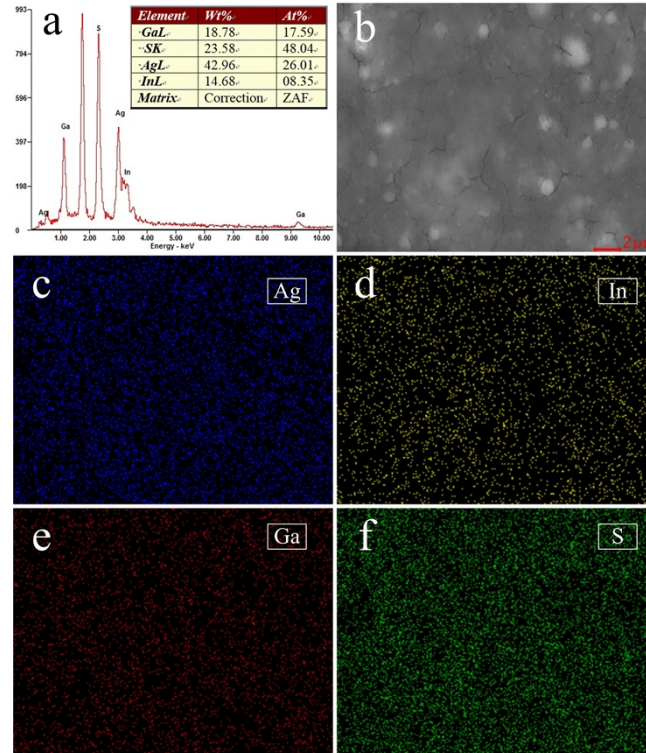

**Fig. S3** EDX spectra and elemental distribution maps for Ag, In, Ga and S of the as-prepared  $\text{AgIn}_{x0.3}\text{Ga}_{0.7}\text{S}_2$  solid solution.

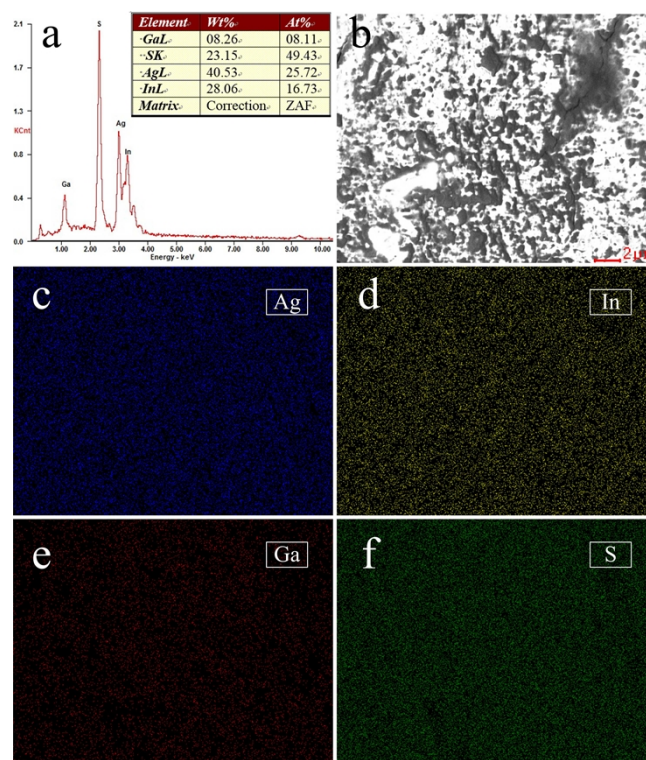

**Fig. S4** EDX spectra and elemental distribution maps for Ag, In, Ga and S of the as-prepared  $\text{AgIn}_{0.7}\text{Ga}_{0.3}\text{S}_2$  solid solution.

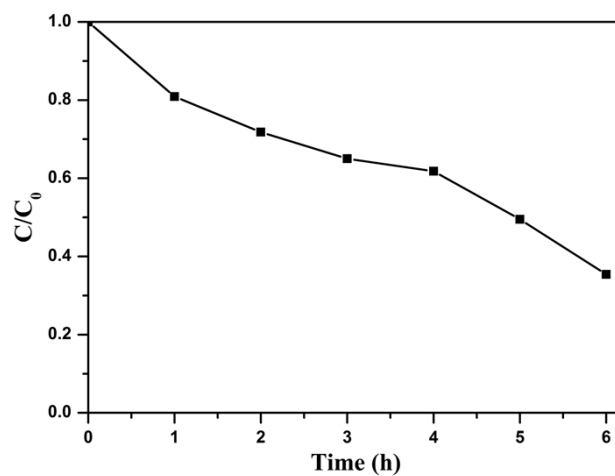

**Fig. S5** Photocatalytic degradation of phenol aqueous solution ( $0.2 \text{ mmol L}^{-1}$ ) with  $\text{AgIn}_{0.3}\text{Ga}_{0.7}\text{S}_2$  as photocatalyst under visible light irradiation ( $\lambda > 400 \text{ nm}$ ).
